# Supplementary material
Source: Springer Nature journal article supplement (https://www.springermedizin.de/resource/supplementary/12904_2009_60_MOESM3_ESM.pdf/9518060)

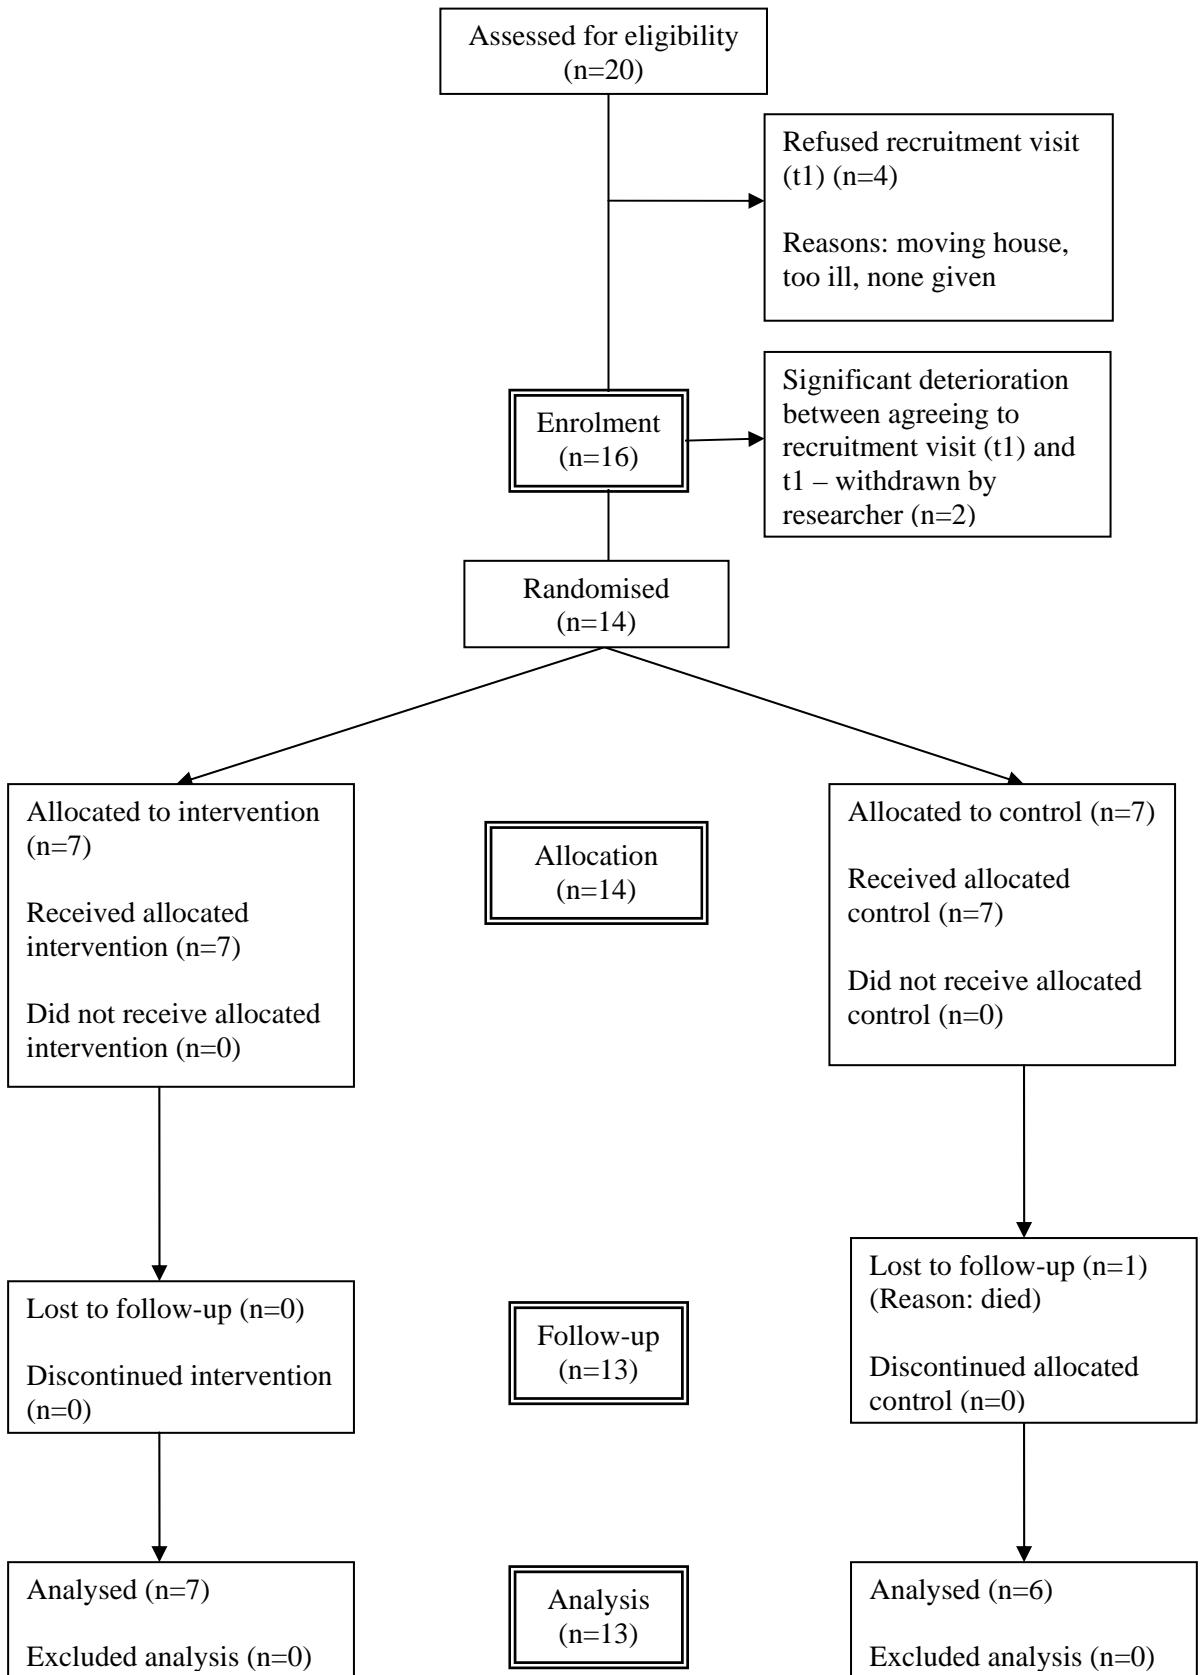

Supplement: MOESM3 [file 9518060]
